# Supplementary material for: MicroRNA Expression in Abdominal and Gluteal Adipose Tissue Is Associated with mRNA Expression Levels and Partly Genetically Driven
Source: PLoS One. 2011 Nov 15;6(11):e27338. doi: 10.1371/journal.pone.0027338 (PMC3216936; doi:10.1371/journal.pone.0027338)
Supplement: Table S4 — Candidate set of miRNA eQTLs in abdominal adipose tissue from the primary study together with results from the confirmation study. (DOC) [file pone.0027338.s011.doc]

**Table S4.** Candidate set of miRNA eQTLs in abdominal adipose tissue from the primary study together with results from confirmation study.

|  |  |  |  |  | **Primary study** | | | | **Replication study** | | |  |
| --- | --- | --- | --- | --- | --- | --- | --- | --- | --- | --- | --- | --- |
| **miRNA**a | **SNP(rs)**b | **Chr**c | **SNP (Position)**d | **Effect allele**e | **snp**f | **std.error snp**g | **p-value**h | **FDR adjusted p-value**i | **snp (study2)**j | **std.error snp (study2)**k | **p-value (study2)**l | **Ref**m |
| hsa-miR-1255a | rs1476159 | 4 | 102500118 | T | 0.133 | 0.029 | 1.83E-05 | 0.081 | 0.164 | 0.063 | 1.39E-02 |  |
| hsa-miR-1255a | rs1822168 | 4 | 102512567 | C | 0.133 | 0.029 | 1.83E-05 | 0.081 | 0.161 | 0.060 | 9.91E-03 |  |
| hsa-miR-1255a | rs10516469 | 4 | 102480276 | T | 0.181 | 0.045 | 1.43E-04 | 0.276 | NA | NA | NA |  |
| hsa-miR-618 | rs10862209 | 12 | 79851086 | A | 0.268 | 0.067 | 1.55E-04 | 0.276 | NA | NA | NA |  |
| hsa-miR-34b | rs4938784 | 11 | 110918675 | T | -0.176 | 0.045 | 1.80E-04 | 0.276 | NA | NA | NA | [23] |
| hsa-miR-31 | rs991794 | 9 | 21541513 | C | -0.156 | 0.039 | 1.86E-04 | 0.276 | 0.053 | 0.116 | 1.00E+00 |  |
| hsa-miR-585 | rs1345592 | 5 | 168573568 | G | 0.195 | 0.050 | 2.18E-04 | 0.277 | 0.201 | 0.107 | 6.53E-02 |  |
| hsa-miR-1244 | rs838436 | 2 | 232291757 | G | -0.277 | 0.071 | 2.53E-04 | 0.282 | -0.057 | 0.098 | 5.66E-01 |  |
| hsa-miR-93* | rs12705070 | 7 | 99494863 | G | -0.268 | 0.071 | 3.53E-04 | 0.294 | -0.268 | 0.141 | 6.37E-02 | [33] |
| hsa-miR-93* | rs2070215 | 7 | 99534733 | C | -0.268 | 0.071 | 3.53E-04 | 0.294 | -0.268 | 0.141 | 6.37E-02 | [33] |
| hsa-miR-1307 | rs11191686 | 10 | 105177736 | A | 0.223 | 0.060 | 3.76E-04 | 0.294 | 0.119 | 0.109 | 2.79E-01 |  |
| hsa-miR-296-3p | rs6100226 | 20 | 56807638 | T | 0.277 | 0.074 | 3.96E-04 | 0.294 | 0.067 | 0.136 | 6.21E-01 |  |
| hsa-miR-618 | rs2701285 | 12 | 79845482 | C | 0.172 | 0.047 | 4.35E-04 | 0.298 | NA | NA | NA |  |
| hsa-miR-769-5p | rs8108561 | 19 | 51198951 | G | 0.106 | 0.029 | 5.09E-04 | 0.316 | NA | NA | NA |  |
| hsa-miR-618 | rs1716543 | 12 | 79854071 | A | 0.207 | 0.057 | 5.34E-04 | 0.316 | 0.345 | 0.116 | 5.80E-03 |  |
| hsa-miR-146a* | rs2961920 | 5 | 159844084 | C | -0.073 | 0.021 | 5.87E-04 | 0.326 | -0.306 | 0.058 | 6.45E-06 |  |
| hsa-miR-185 | rs4819853 | 22 | 18379760 | G | -0.223 | 0.063 | 6.31E-04 | 0.330 | 0.021 | 0.081 | 1.00E+00 |  |
| hsa-miR-1307 | rs2986014 | 10 | 105184076 | T | 0.204 | 0.057 | 6.90E-04 | 0.341 | 0.124 | 0.117 | 2.96E-01 |  |
| hsa-miR-1303 | rs4958761 | 5 | 154046088 | G | -0.183 | 0.053 | 8.71E-04 | 0.407 | -0.213 | 0.126 | 9.69E-02 |  |
| amiRNA name, bRS identifier for each SNP, cchromosome, dgenomics location of SNP, eEffect allele, fcoefficient for the SNP effect in the primary study, gstandard error for the SNP coefficient in the primary study, hp-value for the SNP effect in the primary study, iFDR adjusted p-value for the SNP effect in the primary study, jcoefficient for the SNP effect in the replication study, kstandard error for the SNP coefficient in the replication study, lp-value for the SNP effect in the secondary study, mreferences, (‘NA’ indicate failed assay) | | | | | | | | | | | | |
